*Sertedakis, et al.,*

1 **Expression of putative effectors of different *Xylella fastidiosa***  
2 **subspecies/strains reveals recognition and defense activation**  
3 **in various model plants**

4 *Matthaios Sertedakis*<sup>1§</sup>, *Konstantinos Kotsaridis*<sup>1§</sup>, *Dimitra Tsakiri*<sup>1§</sup>, *Ana Dominguez-*  
5 *Ferreras*<sup>3</sup>, *Vardis Ntoukakis*<sup>3</sup>, *Panagiotis F. Sarris*<sup>1,2,4\*</sup>

6

7 <sup>1</sup> Department of Biology, University of Crete, 714 09 Heraklion, Crete, Greece,

8 <sup>2</sup> Institute of Molecular Biology and Biotechnology, Foundation for Research and Technology-Hellas,  
9 Heraklion, Crete, Greece,

10 <sup>3</sup> School of Life Sciences, University of Warwick, Coventry CV4 7AL, United Kingdom,

11 <sup>4</sup> Biosciences, University of Exeter, Exeter, United Kingdom.

12

13

14

15 § Equal contribution

16

17 **Corresponding Author:**

18 *Professor Panagiotis F. Sarris*, [p.sarris@imbb.forth.gr](mailto:p.sarris@imbb.forth.gr); [p.sarris@uoc.gr](mailto:p.sarris@uoc.gr)

Sertedakis, et al.,

## 19 **SUMMARY**

20 The re-emergence of Gram-negative bacterium *Xylella fastidiosa* in Europe in 2013  
21 impelled the scientific community to discover novel strategies for crop protection. The  
22 wide host range of *Xylella* indicates the existence of yet not characterized pathogenic  
23 mechanisms to overcome plant defenses. The recent uprising accuracy of a variety of  
24 bioinformatics tools, with the ability to predict the function of putative microbial protein  
25 represent a useful approach for understanding which of these proteins are associated  
26 with pathogens virulence. In this study we collected a number of putative effectors from  
27 two *X. fastidiosa* strains: Temecula1 and CoDiRo and the subspecies (ssp.) Sandyi  
28 Ann-1. We designed an *in-planta Agrobacterium* based expression system that drives  
29 the expressed proteins to the cell apoplast, in order to investigate their ability to  
30 activate defense in various model plants. Furthermore, we organized the resulted  
31 proteins according to their sequential and structural similarities via the I-TASSER  
32 online tool. We identified that various *X. fastidiosa* proteins were able to differentially  
33 elicit cell death-like phenotypes in *Nicotiana tabacum*, *N. sylvestris* and *N.*  
34 *benthamiana*. These proteins are members of different enzymatic groups: a)  
35 hydrolases/hydrolases inhibitors, b) serine proteases and c) metal transferases.  
36 Collectively, we identified structurally similar proteins that were able to differentially  
37 elicit cell death-like phenotypes in different cultivars of the same species. Our findings  
38 provide the bases for further studies on the mechanisms that underlie host-defense  
39 activation by *X. fastidiosa* putative effectors, as well as, pathogens adaptation in  
40 susceptible hosts.

Sertedakis, et al.,

## 41 INTRODUCTION

42 Plants respond to invading pathogens by exploiting their innate immunity system.  
43 microbe-associated molecular patterns (MAMP)-triggered immunity (MTI) and effectors  
44 triggered immunity (ETI) have been described as the main two layers of defense during  
45 the infection of a host (Jones, J.D.G., 2006; Duxbury et al., 2016; Mermigka et al.,  
46 2019; Cui et al., 2015). Recent studies have proposed a revised version of the zig-zag  
47 model of plant innate immunity introduced by Jones, J.D.G., 2006 (Jones & Dangl,  
48 2006); strongly indicating the existence of a crosstalk between MTI and ETI. ETI  
49 potentiates MTI immune responses and vice versa (Katagiri & Tsuda, 2010; Ngou et  
50 al., 2021). MTI is responsible for the detection of pathogen/microbe associated  
51 molecular patterns (P/MAMPs) and/or danger associated molecular patterns (DAMPs),  
52 via specific cell surface-localized pattern-recognition receptors (PRRs) (Couto & Zipfel,  
53 2016). MTI shields the plant cell from various pathogen-derived molecules or by  
54 recognizing self-made elicitors (Malukani et al., 2020) and triggering downstream  
55 signaling events to activate defense responses (Schwessinger & Zipfel, 2008; Apama  
56 et al., 2009).

57 MTI defensive outcomes include production of reactive oxygen species (ROS), calcium  
58 influx, activation of mitogen-activated protein kinases (MAPKs), chromatin remodeling,  
59 differential regulation of gene expression and callose deposition. Collectively, these  
60 responses restrict pathogens on the site of the infection and prevent disease  
61 development (Lu et al., 2015; Mur et al., 2008; Pardal et al., 2021; Stotz et al., 2014).

62 In order to reach their nutritional needs and proliferate effectively inside the host,  
63 several pathogens have evolved to secrete virulence factors - known as effectors –  
64 directly into the host-cell cytoplasm or into the extremely hostile apoplastic space. In  
65 several cases, interaction of apoplastic pathogen effectors with plant PRRs has been  
66 associated with induction of immune responses and development of Programmed Cell  
67 Death (PCD) (van der Burgh & Joosten, 2019). For instance, the apoplastic effectors  
68 Avr2 and Avr4 from the fungal pathogen *Cladosporium fulvum* are recognized by the  
69 receptor like proteins (RLPs) *Cf-2* and *Cf-4* respectively in *Solanum lycopersicum* and  
70 trigger a strong defense response, including PCD (Song et al., 2009; Postma et al.,  
71 2016; Ilyas et al., 2015; Kourelis & Van Der Hoorn, 2018). Similarly, the apoplastic  
72 effectors Chp-7 and ChpG of *Clavibacter michiganensis*, elicit PCD when they are  
73 secreted to the apoplast, but not when they are expressed in the host-cell cytoplasm  
74 (Lu et al., 2015). There are additional virulent extracellular effectors related to PCD  
75 phenotypes in plants, however the exact mechanisms of innate immunity underlying  
76 their perception remain deeply uncharacterized (Nissinen et al., 2009; Lu et al., 2015).

Sertedakis, et al.,

77 *X. fastidiosa* (*Xf*) was first described as the causal agent of “Pierce’s disease” (PD) in  
78 grapes and it is an extremely dangerous plant pathogenic bacterium worldwide  
79 (Mollenhauer & Hopkins, 1974; Hopkins & Purcell, 2002; Chatterjee et al., 2008). *Xf* is  
80 a gram negative, slow growing and strictly aerobic bacterium that has been a subject  
81 of interest due to its economic impact. *Xf* has an extremely extended host range which  
82 consists of more than 300 plant species (Baldi & La Porta, 2017), including *Nerium*  
83 *oleander*, *Olea europaea* and *Vitis vinifera* species (Schneider et al., 2020; Food &  
84 Authority, 2018; Huang et al., 2020). While there are emerging studies assessing the  
85 life style of this pathogen, host specificity and colonization strategies, less progress  
86 has been accomplished in the field of the molecular host-pathogen interactions.  
87 Similarly, the individual role(s) of putative virulence proteins secreted by *Xf*, in order to  
88 subvert host’s immune machinery and how this leads to disease development and  
89 finally plant death, is still poorly understood (Roper et al., 2019; Rapicavoli et al., 2018;  
90 Chatterjee et al., 2008; Zhang et al., 2015; Nascimento et al., 2016; Gouran et al.,  
91 2016).

92 *Xf* lacks a Type III translocation system (T3SS); the common bacterial transporter of  
93 virulence factors from the pathogen’s cytosol directly into the host’s intracellular  
94 environment. However, *Xf* possesses Type I, II, IV and V secretion systems (Simpson  
95 et al., 2000; Van Sluys et al., 2003). The *Xf* 12- protein Type II secretion system (T2SS)  
96 with origins to its close relatives of the *Xanthomonas* group, considerably acts as the  
97 main source of its pathogenicity (Rapicavoli et al., 2018). Proteases and cell wall  
98 degrading enzymes (CWDEs) are often secreted by T2SS, while mutations on  
99 essential components of the secretion mechanism, usually lead to avirulent  
100 phenotypes (Rapicavoli et al., 2018).

101 In this study, using the KEGG database, we searched for homologues of various  
102 known type II effector genes of pathogenic microorganisms that could be present in  
103 several *Xf* sequenced genomes (**Suppl. Table S1**). This process resulted in selection  
104 of nineteen putative *Xf* type II effectors originating from two strains and one spp. for  
105 further study (**Suppl. Table S1**).

106 Gene evolution is a process that involves mechanisms such as gene duplications and  
107 horizontal gene transfers, which resulted in the hypothesis that sequence unrelated  
108 genes may have high similarity in their tertiary folding and furthermore have the same  
109 function in pathogen virulence (de Guillen et al., 2015; Andrie et al., 2008). Based on  
110 this hypothesis and using I-TASSER online server, we compared the protein with the  
111 highest sequence similarity with the one, which was used as a template for the

Sertedakis, et al.,

112 predicted structures of the selected *Xf* proteins (Roy et al., 2010; Yang et al., 2015;  
113 Yang & Zhang, 2015) (**Fig. 1 & Suppl. Fig. S1**).

114

115

116

## 117 **MATERIALS & METHODS**

118

### 119 **Plant material**

120 Three wild type (WT) *Nicotiana* species were used for our study; *N. tabacum* cultivars  
121 N34/4, Xanthi, Petit Gerard, *N. sylvestris* ecotypes ITB626, NIC6, A34750352,  
122 A04750326, NS25 and TW136 and *Nicotiana benthamiana*. All plants were grown  
123 under greenhouse conditions, at 23°C and under a 16-hour photoperiod.

### 124 **Bacterial strains**

125 *Escherichia coli* (strains Stellar and DH10b) were routinely grown on LB medium with  
126 the appropriate antibiotics and incubation at 37°C for 16 hours (h). Liquid cultures were  
127 grown at 37°C for 16 h applying shaking at 200 rpm.

128 *Agrobacterium tumefaciens* (strains AGL1, C58C1 and GV3101) were grown on LB  
129 medium plates with selective antibiotics and incubation at 28°C for two days. Liquid  
130 cultures were grown at 28°C for 24h while shaking at 200 rpm.

131 Available genomic data banks for three strains of *Xylella fastidiosa* (strains Temecula1,  
132 CoDiRo and Sandyi ann-1) allowed DNA synthesis of effector genes.

### 133 **Cloning & Constructs**

134 All 19 effectors of *Xylella fastidiosa* (originating from Temecula1, CoDiRo, Sandyi ann-  
135 1 strains) were synthesized and introduced in plasmid vector pICH41308, kindly  
136 provided by Dr. Vardis Ntoukakis (Department of Life Sciences, University of Warwick).  
137 Effector genes along with a 35S promoter, fused to the coding sequence of secretion  
138 peptide of tobacco PR1a (Pathogenesis-Related protein 1a) and NOS terminator were  
139 transferred in binary vector pICH86966 and cloned using Golden Gate cloning (Engler  
140 et al., 2008). pMDC:spC7HPB construct, kindly provided by Professor Jane  
141 Glazebrook (Department of Plant Biology, University of Minnesota), was introduced in  
142 *Agrobacterium tumefaciens* AGL1 and was used in this study as a positive marker of  
143 apoplastic HR-like cell for *in planta* assays. pBluescript::PR1a\_sp,  
144 pICH86988::XopQ:YFP and pICH86988::GUS:YFP plasmids that were used in this

Sertedakis, et al.,

145 work had already been constructed for a previous study in our lab (Michalopoulou et  
146 al., 2020).

#### 147 ***Agrobacterium*-mediated transient expression *in planta***

148 Transformed *Agrobacterium* cells were grown on LB agar plates with selective  
149 antibiotics for 2 days. Single colonies were used to inoculate LB liquid medium  
150 containing selective antibiotics and were cultured for 24h. Cells were then harvested  
151 by centrifugation, washed with 5 ml of 10mM MgCl<sub>2</sub> and re-suspended in 1 ml MM  
152 solution (10mM MgCl<sub>2</sub>, 10mM MES [pH 5.6]). OD<sub>600</sub> was adjusted to 0.5 with MM and  
153 the bacteria were then used for infiltration of plant leaves with a blunt end syringe. Six  
154 week old plants were challenged with *Agrobacterium*, leading to *in planta* transient  
155 expression of *Xf* effectors, as well as positive and negative markers for identification  
156 of HR-like Programmed Cell Death (PCD). Infiltrated plants were incubated under  
157 greenhouse conditions (23°C, 16-hour photoperiod) and HR-like cell death was  
158 assessed 4dpi.

#### 159 ***In silico* structural predictions of proteins**

160 Structural predictions were made using the I-TASSER online server. Comparisons  
161 were performed between the protein with the highest sequence similarity with the one  
162 used as a template for the predicted structures of the selected *Xf* proteins (Roy et al.,  
163 2010; Yang et al., 2015; Yang & Zhang, 2015). The predicted structure with TM-score  
164 >5 was considered reliable. Visualization of the structures was carried out through  
165 Pymol v2.3.1 (Schrodinger & DeLano., 2020).

166

## 167 **RESULTS & DISCUSSION**

168 To test whether these proteins can elicit PCD after their delivery into the plant apoplast,  
169 we first synthesized the corresponding genes including silent mutations where needed  
170 to domesticate the sequences making them compatible with the Golden Gate system.  
171 Then, we cloned the synthesized genes of interest in an *Agrobacterium*-mediated  
172 transient expression system (**Fig. 2a**). The gene expression in this system was under  
173 the transcriptional regulation of the constitutive CaMV 35S promoter. To ensure  
174 secretion of the protein into the apoplast we fused the selected *Xf* proteins to the  
175 secretion peptide of tobacco PR1a (Pathogenesis-Related protein 1a) (Lu et al., 2015).  
176 The PR1a secretion peptide is cleaved upon secretion to the apoplast (Lu et al., 2015).  
177 We generated 19 such constructs to screen for PCD symptoms by the selected *Xf*  
178 proteins. For our screening we used three distinct *Nicotiana tabacum* cultivars (N34'4,

Sertedakis, et al.,

179 Petit Gerard, Xanthi); the *N. benthamiana* and six *N. sylvestris* ecotypes. As a positive  
180 control we used the *Clavibacter michiganensis* apoplastic effector Chp7 that has been  
181 shown to elicit an PCD response upon its secretion to the apoplast by the PR1a  
182 secretion peptide (Lu et al., 2015) (**Fig. 2b & Suppl. Fig. S2**). Furthermore, the type  
183 III effector XopQ of *Xanthomonas campestris* pv. *vesicatoria*, served as a secondary  
184 positive control, due to its known ability to elicit Hypersensitive Response (HR) in both  
185 *N. tabacum* and *N. benthamiana* (Adlung et al., 2016). *Agrobacterium*-mediated  
186 transient expression of the GUS reporter gene in these species did not elicit cell death  
187 and it was used as a negative control for our transient expression assays.

188 Our screening revealed nine proteins that are known or predicted to be type II-secreted  
189 by *X. fastidiosa* and were able to elicit PCD phenotypes in different *Nicotiana* species  
190 (**Fig. 2b**). Most of these proteins successfully elicited PCD four days' post inoculation  
191 (4 dpi) in all three *N. tabacum* cultivars used and four out of six *N. sylvestris* ecotypes.  
192 Interestingly, all nine effectors tested for induction of PCD displayed divergence in  
193 distinct *N. sylvestris* ecotypes, while the protein encoded by D934\_09300 was able to  
194 elicit cell death in *N. tabacum* cv. "N34'4" and cv. "Xanthi" leaves but not in *N. tabacum*  
195 cv. "Petit Gerard", indicating a form of specificity in this response. Moreover, signs of  
196 cell death were entirely missing from *N. benthamiana* leaves suggesting that the  
197 responses observed in *N. sylvestris* and *N. tabacum* are most likely not a result of  
198 cytotoxic effects. Apart from these nine putative effectors, ten more proteins were  
199 studied but did not elicit PCD in any plant species/cultivar tested in this study (**Suppl.**  
200 **Fig. S1**).

201 Cell death phenotypes varied in severity and seemed to develop at different rates. In  
202 order to comprehensively evaluate our results, we first assigned a cell death score to  
203 each observed cell death phenotype, based on its intensity (**Suppl. Fig. S2**).

204 We also reviewed the frequency of a certain score regarding both the studied protein  
205 and the plant cultivar used in each experiment (**Suppl. Fig. S3**). The necrotic  
206 phenotype observed in *N. sylvestris* and *N. tabacum* cv. "N34'4" plants was typically  
207 more pronounced compared to that of tobacco cultivars "Petit Gerard" and "Xanthi".  
208 For this, we have to consider potential differences in the transformation efficiency of  
209 distinct cultivars under the transient expression system we applied. However, these  
210 results could also indicate that the same protein may elicit PCD of varying intensity  
211 when introduced to different *Nicotiana* relatives or cultivars of the same plant species  
212 and hint that the potency of this type of response is possibly host-dependent.



Sertedakis, et al.,

213 The *in silico* structural prediction presented here, indicates that all three proteins  
214 encoded by PD\_0956, RA12\_05570 and D934\_07885, which successfully elicited  
215 PCD in all studied tobacco cultivars and in *N. sylvestris* ecotype A\_34750352, have a  
216 high structural similarity with hydrolases (**Fig.1; Table 1**). Hydrolases form a big distinct  
217 enzyme class that includes enzymes which act as biochemical catalysts by using water  
218 molecules to break chemical bonds. This class contains enzymes classified as: a)  
219 lipases; b) phosphatases; c) glycosidases; d) peptidases; and e) nucleosidases.  
220 Specifically, serine proteases/endopeptidases/hydrolases are enzymes where the  
221 nucleophilic serine residue in their active center is used for the hydrolysis of their  
222 substrates (Simon & Cravatt, 2010). Hydrolases group includes proteases that are  
223 secreted by various pathogens having a wide range of functions in virulence. They also  
224 constitute an important group of *X. fastidiosa* including cell wall-degrading enzymes  
225 (CWDEs) (Nascimento et al., 2016). CWDEs presence in the apoplast can trigger  
226 immunity responses, mostly through a modified “self” recognition of degradation  
227 products of these enzymes by plant PRRs (van der Burgh & Joosten, 2019). Similarly,  
228 serine proteases delivered by pathogens into the apoplast have been shown to activate  
229 PCD (Lu et al., 2015). Provided that PD\_0956, RA12\_05570 and D934\_07885  
230 proteins’ putative enzymatic activity is valid, their ability to elicit PCD could be  
231 considered a DAMP-recognition event. Serine proteases are also present in large  
232 families of plant extracellular proteins that are often involved in signaling pathways  
233 associated with pathogen resistance (Hou et al., 2019). Therefore, manipulation of  
234 such pathways by bacterial proteases could be a virulence strategy.

235 Another prominent group of *Xf* proteins is that of PD\_1703, RA12\_01530 and  
236 D934\_08750 that all trigger PCD in three tobacco cultivars and two *N. sylvestris*  
237 ecotypes TW\_136, NS\_25 but not to ITB\_626 (**Fig. 2b**) (Zhang et al., 2015). According  
238 to our structural analysis (**Table 1**), the last two proteins revealed similarities to LipA,  
239 a known *Xanthomonas oryzae* pv. *oryzae* cell wall degrading enzyme (CWDE). While,  
240 for the PD\_1703, even if it was previously characterized as a LipA-like protein  
241 (Nascimento et al., 2016), according to our I-TASSER structural prediction, it revealed  
242 similarities to Hydrolase/Serine proteases (**Table 1**). However, hydrolases class is one  
243 of the largest and most diverse enzyme families which among others includes  
244 proteases and lipases, so, this might be a misannotation of the particular protein  
245 database.

246 LipA homologues are present in all sequenced Xanthomonads and are predicted  
247 lipases, although LipA actually exhibits esterase activity (Apama et al., 2009) (**Fig. 3**).  
248 LipA is known to elicit immune responses in rice and recent findings point to the



Sertedakis, et al.,

249 possible involvement of a rice Wall-Associated Kinase (WAK) *OsWAKL21.2* in LipA  
250 recognition (Jha et al., 2007; Malukani et al., 2020). Structural similarities of LipA with  
251 PD\_1703, RA12\_01530 and D934\_08750, could mean that these proteins act and are  
252 recognized in a similar manner (this finding is under further investigation by our group).  
253 Notably, PD\_1703 has been shown to elicit PCD in grapevine a known *Xf* ‘Temecula-  
254 1’ host. However, PD\_1703 was found to be vital for *Xf* virulence in grapevines,  
255 suggesting that other virulence components of the pathogen could potentially suppress  
256 the PCD induction (Nascimento et al., 2016).

257 In this study we also focus on three *Xf* proteins encoded by PD\_0915, D934\_09265  
258 and D934\_09300 that were found to elicit apoplastic PCD in tobacco and one *N.*  
259 *sylvestris* ecotype (**Fig. 2b; Table 1**). Structural analysis revealed that this group  
260 consists of proteins with sequence and structural similarity to “*Zonula occludens*” toxins  
261 or “Zot proteins”, although PD\_0915 was predicted to be more confidently similar to a  
262 metal-transferase. The “Zot” protein was described first in *Vibrio cholera*, where it is  
263 involved in intestinal barrier disturbance, however, “Zot” proteins were identified later  
264 in several other pathogens (Pérez-Reytor et al., 2018, 2020) (**Fig. 3**). Zot proteins have  
265 been associated with high cytotoxicity before (Pérez-Reytor et al., 2018), though this  
266 is not always the case. For instance, in *Vibrio parahaemolyticus*, “Zot” expression did  
267 not positively correlate with cytotoxicity, rather than with an actin disturbance on  
268 infected cells (Pérez-Reytor et al., 2020). *Xf* putative “Zot” proteins studied here appear  
269 not to correlate to cytotoxic effects. Interestingly, the protein encoded by D934\_09300  
270 did elicit PCD in the apoplast of *N. tabacum* cv. “N34’4” and cv. “Xanthi”, and *N.*  
271 *sylvestris* ecotype NS\_25 but this kind of response was not observed in *N. tabacum*  
272 cv. “Petit Gerard”; or in *N. sylvestris* ecotype ITB\_626 and in *N. benthamiana* (**Fig. 2b**).  
273 These data suggest specific recognition of D934\_09300 and highlight the complexity  
274 of the plant surveillance system and its possible differentiation among distinct cultivars  
275 of the same species.

276 Finally, ten putative *Xf* effectors, which were unable to induce necrosis during *in planta*  
277 assays in the selected hosts, were also analyzed for their tertiary structures using I-  
278 TASSER online server and certain predictions could be made for their folding and  
279 function (**Suppl. Fig. S1; Table 1**). Notably, LipA-like proteins D934\_08755 or  
280 D934\_12535, despite their strong correlation with other cell death inducers described  
281 in this study (PD\_1703, D934\_08750, RA12\_01530), were incapable of causing similar  
282 phenotypes when expressed in the apoplast of *Nicotiana* species. This potentially  
283 indicates putative alterations on their active sites that prevent their binding to specific  
284 substrates of plant cell wall.

Sertedakis, et al.,

285 All the nineteen proteins were used for phylogenetic analysis using homolog proteins  
286 obtained from the KEGG database (**Fig. 3; Suppl. Fig. S4**).

287 Our data, collectively, pinpoint nine proteins belonging to the sparsely studied *X.*  
288 *fastidiosa* putative “effectorome” that can elicit PCD when transiently expressed and  
289 secreted into the leaf apoplast of different *Nicotiana* species. These proteins are  
290 structurally predicted as putative “CWDEs” or “Zot toxins” that originate from different  
291 *X. fastidiosa* strains/subspecies. Lack of signs of cytotoxicity, along with the predicted  
292 enzymatic activity of these proteins, hints their possible recognition by the plant innate  
293 immunity system. At least in one case, the protein eliciting the response is a known  
294 required virulence factor of the pathogen, suggesting that it employs other virulence  
295 strategies to suppress immune responses and avoid recognition. The suppression of  
296 immune responses through type III-delivered effector proteins is a common feature  
297 among other members of the *Xanthomonadaceae* family (Jha et al., 2007). However,  
298 since *X. fastidiosa* lacks such a system (Rapicavoli et al., 2018), how this bacterium  
299 avoids recognition by the host’s surveillance system, remains to be elucidated. In  
300 summary, our findings, open possibilities and encourage further investigation and  
301 identification of the related PRRs that could be a potential biotechnological tool to  
302 confer broad-spectrum disease resistance against *X. fastidiosa*. Quite recently, the  
303 expression of a PRR receptor in sweet orange has been shown to confer ligand-  
304 dependent activation of defense responses against a citrus infecting strain of *X.*  
305 *fastidiosa* (Mitre et al., 2021).

306

*Sertedakis, et al.,*

307 **Acknowledgements**

308 The project was partially supported by the "The Vineyard Roads" (project code:  
309 2018ΣΕ01300000) part of the "Emblematic Research Action of National Scope for the  
310 exploitation of new technologies in the Agri-food sector, specializing in genomic  
311 technologies and pilot application in the value chains of "olive", "grapevine", "honey  
312 "and "livestock")» financed by Greek national funds through the Public Investments  
313 Program (PIP) of General Secretariat for Research & Technology (GSRT) Duration  
314 2019-2021.

315

316

317 **Authors' contributions**

318 P.F.S. designed the research. M.S., K.K, and D.T. performed the research. V.D. and  
319 P.F.S. analysed the data. V.D. and A.D.F. provided technical support; lab material and  
320 tools. M.S., K.K, and D.T. and P.F.S. wrote the paper. All authors have read and  
321 approved the manuscript.

322

Sertedakis, et al.,

## 323 FIGURES & TABLES LEGENDS

324 **Table 1.** Sequence similar and structural template proteins for the predicted structures  
325 of the nineteen selected *Xylella fastidiosa* putative proteins using I-TASSER.

326

327 **Figure 1.** Predicted model presentation of the selected *Xylella fastidiosa* putative  
328 effectors using I-TASSER online server. The proteins presented here successfully  
329 elicited programmed cell death (PCD) in at least one plant cultivar/species tested. The  
330 colors suggest the protein orientation (Blue: N-termini, Red: C-termini). **(a-b)**  
331 Hydrolase/ Esterase (LipA), **(c-f)** Hydrolase and **(g-i)** Zonular Occludens Toxin,  
332 according to their sequence similarities. We used Pymol v2.3.1 to visualize the  
333 structures (Schrodinger & DeLano., 2020).

334 **Figure 2.** Putative *Xylella fastidiosa* apoplastic effector proteins elicit programmed cell  
335 death (PCD) in *Nicotiana spp.* **(a)** Schematic representation of the cassette that was  
336 cloned in an *Agrobacterium*-mediated plant transient expression system. Genes of  
337 interest were under the control of the constitutive CaMV 35S promoter. Secretion of  
338 the protein into the leaf apoplast was achieved through fusion to the secretion peptide  
339 of tobacco PR1a, which is cleaved during protein secretion (Lu et al., 2015). This figure  
340 was created with BioRender.com. **(b)** Apoplastic effector PR1 sp-Chp7 from  
341 *Clavibacter michiganensis* along with intracellular acting effector XopQ from  
342 *Xanthomonas campestris* pv. *vesicatoria* were used as positive Programmed Cell  
343 Death (PCD) - HR markers, while GUS gene served as the negative control for these  
344 assays (Lu et al., 2015; Adlung et al., 2016). *X. fastidiosa* virulence factors which  
345 induced PCD, following overexpression in the plant apoplast, are illustrated above.  
346 PCD occurred 4 days post infiltration under room temperature, in all studied cases.  
347 The assays were repeated at least five times for each putative effector with similar  
348 results.

349 **Figure 3.** Phylogenetic trees were constructed for all nineteen putative *Xf* effector  
350 proteins that are presented in this study, which were divided into subgroups based on  
351 their ability to elicit programmed cell death (PCD) and on their orthology, according to  
352 KEGG database: **(A-D)** Proteins that induced PCD in this study, with a predicted  
353 orthology of **(A)** lipases, **(B)** peptidases, **(C-D)** Zona Occludens Toxins. These proteins  
354 were correlated with 35 close protein relatives from *Xanthomonas*, *Clavibacter*,  
355 *Ralstonia*, *Amycolatopsis*, *Pseudarthrobacter*, *Dermatophilus*, *Streptomyces*,  
356 *Stenotrophomonas*, *Moraxela*, *Azoarcus*, *Collimonas*, *Sulfurimicrobium*,  
357 *Chromobacterium* genera and viruses *Stenotrophomonas* phage phiSHP2,

*Sertedakis, et al.,*

358 *Stenotrophomonas* phage SMA6. The evolutionary history in each group presented  
359 here was inferred using the Neighbor-Joining method (Saitou & Nei, 1987). The  
360 bootstrap consensus tree inferred from 1500 replicates is taken to represent the  
361 evolutionary history of the different taxa belonging amino-acid sequences as  
362 mentioned before. The evolutionary distances were computed using the Poisson  
363 correction method (Zuckerkandl & Pauling, 1965) and are in the units of the number of  
364 amino acid substitutions per site. Evolutionary analysis was conducted in MEGA X  
365 (Kumar et al., 2018). The abbreviations of microbes and the gene loci used for the  
366 construction of these phylogenetic trees are presented in **Supplementary Table S2**.

Sertedakis, et al.,

## 367 SUPPLEMENTARY DATA LEGENDS

368 **Supplementary Table S1.** All 19 effector proteins tested for induction of PCD in  
369 *Nicotiana* species owe their origins to two pathogenic strains of *Xylella fastidiosa*  
370 Temecula1, CoDiRO and ssp. *Sandyi*. Each strain has been associated with infectious  
371 diseases in susceptible hosts *Vitis vinifera*, Olive trees and *N. oleander*.

372 **Supplementary Table S2.** Bacterial species and gene loci members used for  
373 phylogenetic analysis presented in **Figure 3** and **Supplementary Figure S4**.

374

375 **Supplementary Figure S1.** Predicted model presentation of the selected *Xylella*  
376 *fastidiosa* effectors using I-TASSER online server. The proteins presented here did not  
377 elicit programmed cell death (PCD) in any of the plant cultivar/species tested. The colors  
378 suggest the protein orientation (Blue: N-termini, Red: C-termini). **(a-c)** Transport  
379 Protein, **(d)** Membrane Protein, **(e-f)** Hydrolase/ Esterase (LipA), **(g)** Cell Adhesion  
380 protein, **(h)** Hydrolase, **(i)** Oxidoreductase and **(k)** Gene Regulation. We used Pymol  
381 v2.3.1 to visualize the structures. The presented proteins did not induce PCD  
382 phenotype in any tested plant cultivars (Schrodinger & DeLano., 2020).

383 **Supplementary Figure S2.** *Xylella fastidiosa* virulence factors which did not elicit  
384 programmed cell death (PCD), following overexpression in the plant apoplast, are  
385 illustrated above. Photographs of infiltrated leaves were taken 4 days post infiltration.  
386 In all cases, plants were incubated at room temperature. Apoplastic effector PR1 sp-  
387 Chp7 from *Clavibacter michiganensis* along with intracellular acting effector XopQ from  
388 *Xanthomonas campestris* pv. *vesicatoria* were used as positive Programmed Cell  
389 Death (PCD) - HR markers, while GUS gene served as the negative control for these  
390 assays (Lu et al., 2015; Adlung et al., 2016). The assays were repeated at least five  
391 times for each putative effector with similar results.

392 **Supplementary Figure S3.** Cell death intensity score. Cell death score percentage  
393 (%) in this diagram is representative of all consistent experimental replicates previously  
394 introduced in Figure 2b. Diagram bars are color-coded based on a cell death intensity  
395 scale 0-4. Colors in each bar represent the cell death score in percentage out of the  
396 total infiltrated panels scored for the nine *Xylella fastidiosa* proteins that elicited  
397 programmed cell death (PCD) in *Nicotiana spp.*

398 **Supplementary Figure S4. (A-B)** Proteins that did not induce programmed cell death  
399 (PCD) in this study, with a predicted orthology of **(A)** lipases and **(B)** haemagglutinins.

*Sertedakis, et al.,*

400 These groups of proteins from *Xylella fastidiosa* were correlated with 56 proteins with  
401 origins to bacterial genera of *Pectobacterium*, *Rhodospirillum*, *Ralstonia*, *Pseudomonas*,  
402 *Stenotrophomonas*, *Edwardsiella* and *Lysobacter* (Saitou & Nei, 1987). The  
403 evolutionary history in each group presented here was inferred using the Neighbor-  
404 Joining method (Saitou & Nei, 1987). The bootstrap consensus tree inferred from 1500  
405 replicates is taken to represent the evolutionary history of the different taxa belonging  
406 amino-acid sequences as mentioned before. The evolutionary distances were  
407 computed using the Poisson correction method (Zuckerkanndl & Pauling, 1965) and are  
408 in the units of the number of amino acid substitutions per site. Evolutionary analysis  
409 was conducted in MEGA X (Kumar et al., 2018). The abbreviations of microbes and  
410 the gene loci used for the construction of these phylogenetic trees are presented in  
411 **Supplementary Table S2.**



Sertedakis, et al.,

## 412 References

- 413 Adlung, N., Prochaska, H., Thieme, S., Banik, A., Blüher, D., John, P., Nagel, O.,  
414 Schulze, S., Gantner, J., Delker, C., Stuttmann, J., & Bonas, U. (2016). Non-  
415 host resistance induced by the *Xanthomonas* effector XopQ is widespread  
416 within the genus *Nicotiana* and functionally depends on EDS1. *Frontiers in Plant*  
417 *Science*, 7(NOVEMBER2016). <https://doi.org/10.3389/fpls.2016.01796>
- 418 Andrie, R. M., Schoch, C. L., Hedges, R., Spatafora, J. W., & Ciuffetti, L. M. (2008).  
419 Homologs of ToxB, a host-selective toxin gene from *Pyrenophora tritici-repentis*,  
420 are present in the genome of sister-species *Pyrenophora bromi* and other  
421 members of the Ascomycota. *Fungal Genetics and Biology*, 45(3), 363–377.  
422 <https://doi.org/https://doi.org/10.1016/j.fgb.2007.10.014>
- 423 Apama, G., Chatterjee, A., Sonti, R. V., & Sankaranarayanan, R. (2009). A cell wall-  
424 degrading esterase of *xanthomonas oryzae* requires a unique substrate  
425 recognition module for pathogenesis on rice. *Plant Cell*, 21(6), 1860–1873.  
426 <https://doi.org/10.1105/tpc.109.066886>
- 427 Baldi, P., & La Porta, N. (2017). *Xylella fastidiosa*: Host Range and Advance in  
428 Molecular Identification Techniques. *Frontiers in Plant Science*, 8, 944.  
429 <https://doi.org/10.3389/fpls.2017.00944>
- 430 Chatterjee, S., Almeida, R. P. P., & Lindow, S. (2008). Living in two worlds: The plant  
431 and insect lifestyles of *Xylella fastidiosa*. *Annual Review of Phytopathology*, 46,  
432 243–271. <https://doi.org/10.1146/annurev.phyto.45.062806.094342>
- 433 Couto, D., & Zipfel, C. (2016). Regulation of pattern recognition receptor signalling in  
434 plants. *Nature Reviews Immunology*, 16(9), 537–552.  
435 <https://doi.org/10.1038/nri.2016.77>
- 436 Cui, H., Tsuda, K., & Parker, J. E. (2015). Effector-Triggered Immunity: From  
437 Pathogen Perception to Robust Defense. *Annual Review of Plant Biology*, 66(1),  
438 487–511. <https://doi.org/10.1146/annurev-arplant-050213-040012>
- 439 de Guillen, K., Ortiz-Vallejo, D., Gracy, J., Fournier, E., Kroj, T., & Padilla, A. (2015).  
440 Structure Analysis Uncovers a Highly Diverse but Structurally Conserved  
441 Effector Family in Phytopathogenic Fungi. *PLoS Pathogens*, 11(10), e1005228.
- 442 Duxbury, Z., Ma, Y., Furzer, O. J., Huh, S. U., Cevik, V., Jones, J. D. G., & Sarris, P.  
443 F. (2016). Pathogen perception by NLRs in plants and animals: Parallel worlds.  
444 *BioEssays*, 38(8), 769–781. <https://doi.org/10.1002/bies.201600046>
- 445 Engler, C., Kandzia, R., & Marillonnet, S. (2008). A one pot, one step, precision  
446 cloning method with high throughput capability. *PLoS ONE*, 3(11).  
447 <https://doi.org/10.1371/journal.pone.0003647>
- 448 Food, E., & Authority, S. (2018). Update of the *Xylella* spp. host plant database.  
449 *EFSA Journal*, 16(9). <https://doi.org/10.2903/j.efsa.2018.5408>
- 450 Gouran, H., Gillespie, H., Nascimento, R., Chakraborty, S., Zaini, P. A., Jacobson,  
451 A., Phinney, B. S., Dolan, D., Durbin-Johnson, B. P., Antonova, E. S., Lindow,  
452 S. E., Mellema, M. S., Goulart, L. R., & Dandekar, A. M. (2016). The Secreted  
453 Protease PrtA Controls Cell Growth, Biofilm Formation and Pathogenicity in  
454 *Xylella fastidiosa*. *Scientific Reports*, 6(August), 1–13.  
455 <https://doi.org/10.1038/srep31098>

Sertedakis, et al.,

- 456 Hopkins, D. L., & Purcell, a H. (2002). % Cwug Qh 2Kgteg U & Kugcug Qh )  
457 Tcrgxkpg Cpf 1Vjgt ' Ogtigpv & Kugcugu. *Plant Disease*, 86(10), 1056–1066.
- 458 Hou, S., Liu, Z., Shen, H., & Wu, D. (2019). *Damage-Associated Molecular Pattern-*  
459 *Triggered Immunity in Plants*. 10(May). <https://doi.org/10.3389/fpls.2019.00646>
- 460 Huang, W., Reyes-Caldas, P., Mann, M., Seifbarghi, S., Kahn, A., Almeida, R. P. P.,  
461 Béven, L., Heck, M., Hogenhout, S. A., & Coaker, G. (2020). Bacterial Vector-  
462 Borne Plant Diseases: Unanswered Questions and Future Directions. *Molecular*  
463 *Plant*, 13(10), 1379–1393. <https://doi.org/10.1016/j.molp.2020.08.010>
- 464 Ilyas, M., Hörger, A. C., Bozkurt, T. O., Van Den Burg, H. A., Kaschani, F., Kaiser,  
465 M., Belhaj, K., Smoker, M., Joosten, M. H. A. J., Kamoun, S., & Van Der Hoorn,  
466 R. A. L. (2015). Functional Divergence of Two Secreted Immune Proteases of  
467 Tomato. *Current Biology*, 25(17), 2300–2306.  
468 <https://doi.org/10.1016/j.cub.2015.07.030>
- 469 Jha, G., Rajeshwari, R., & Sonti, R. V. (2007). Functional interplay between two  
470 *Xanthomonas oryzae* pv. *oryzae* secretion systems in modulating virulence on  
471 rice. *Molecular Plant-Microbe Interactions*, 20(1), 31–40.  
472 <https://doi.org/10.1094/MPMI-20-0031>
- 473 Jones, J. D. G., & Dangl, J. L. (2006). The Plant Immune System. *Nature*, 444(7117),  
474 323–329.
- 475 Katagiri, F., & Tsuda, K. (2010). Understanding the plant immune system. *Molecular*  
476 *Plant-Microbe Interactions*, 23(12), 1531–1536. [https://doi.org/10.1094/MPMI-](https://doi.org/10.1094/MPMI-04-10-0099)  
477 04-10-0099
- 478 Kourelis, J., & Hoorn, R. A. L. Van Der. (2018). *Defended to the Nines : 25 Years of*  
479 *Resistance Gene Cloning Identi fi es Nine Mechanisms for R Protein Function*.  
480 30(February), 285–299. <https://doi.org/10.1105/tpc.17.00579>
- 481 Kumar, S., Stecher, G., Li, M., Knyaz, C., & Tamura, K. (2018). MEGA X: Molecular  
482 Evolutionary Genetics Analysis across Computing Platforms. *Molecular Biology*  
483 *and Evolution*, 35(6), 1547–1549. <https://doi.org/10.1093/molbev/msy096>
- 484 Lu, Y., Hatsugai, N., Katagiri, F., Ishimaru, C. A., & Glazebrook, J. (2015). Putative  
485 serine protease effectors of *clavibacter michiganensis* induce a hypersensitive  
486 response in the apoplast of *nicotiana* species. *Molecular Plant-Microbe*  
487 *Interactions*, 28(11), 1216–1226. <https://doi.org/10.1094/MPMI-02-15-0036-R>
- 488 Malukani, K. K., Ranjan, A., Hota, S. J., Patel, H. K., & Sonti, R. V. (2020). Dual  
489 activities of receptor-like kinase OsWAKL21.2 induce immune responses. *Plant*  
490 *Physiology*, 183(3), 1345–1363. <https://doi.org/10.1104/pp.19.01579>
- 491 Mermigka, G., Amprazi, M., Mentzelopoulou, A., Amartolou, A., & Sarris, P. F.  
492 (2019). Plant and Animal Innate Immunity Complexes: Fighting Different  
493 Enemies with Similar Weapons. *Trends in Plant Science*, 1–12.  
494 <https://doi.org/10.1016/j.tplants.2019.09.008>
- 495 Michalopoulou, V. A., Kotsaridis, K., & Mermigka, G. (2020). The host exocyst  
496 complex is targeted by a conserved bacterial type III effector protein that  
497 promotes virulence. *BioRxiv*, 1–32.
- 498 Mitre, L. K., Sousa Teixeira-Silva, N., Rybak, K., Magalhães, M., Rodrigues de  
499 Souza-Neto, R., Robotzek, S., & Alves de Souza, A. (2021). The Arabidopsis

Sertedakis, et al.,

- 500 immune receptor EFR increases resistance to the bacterial pathogens  
501 *Xanthomonas* and *Xylella* in transgenic sweet orange. *BioRxiv*,  
502 2021.01.22.427732. <https://doi.org/10.1101/2021.01.22.427732>
- 503 Mollenhauer, H. H., & Hopkins, D. L. (1974). Ultrastructural study of Pierce's disease  
504 bacterium in grape Xylem tissue. *Journal of Bacteriology*, 119(2), 612–618.  
505 <https://doi.org/10.1128/jb.119.2.612-618.1974>
- 506 Mur, L. A. J., Kenton, P., Lloyd, A. J., Ougham, H., & Prats, E. (2008). The  
507 hypersensitive response; The centenary is upon us but how much do we know?  
508 *Journal of Experimental Botany*, 59(3), 501–520.  
509 <https://doi.org/10.1093/jxb/erm239>
- 510 Nascimento, R., Gouran, H., Chakraborty, S., Gillespie, H. W., Almeida-Souza, H. O.,  
511 Tu, A., Rao, B. J., Feldstein, P. A., Bruening, G., Goulart, L. R., & Dandekar, A.  
512 M. (2016). The Type II Secreted Lipase/Esterase LesA is a Key Virulence Factor  
513 Required for *Xylella fastidiosa* Pathogenesis in Grapevines. *Scientific Reports*,  
514 6(November 2015), 1–17. <https://doi.org/10.1038/srep18598>
- 515 Ngou, B. P. M., Ahn, H. K., Ding, P., & Jones, J. D. G. (2021). Mutual potentiation of  
516 plant immunity by cell-surface and intracellular receptors. *Nature*, April 2020.  
517 <https://doi.org/10.1101/2020.04.10.034173>
- 518 Nissinen, R., Xia, Y., Mattinen, L., Ishimaru, C. A., Knudson, D. L., Knudson, S. E.,  
519 Metzler, M., & Pirhonen, M. (2009). The putative secreted serine protease chp-7  
520 Is required for full virulence and induction of a nonhost hypersensitive response  
521 by *Clavibacter michiganensis* subsp. *sepedonicus*. *Molecular Plant-Microbe*  
522 *Interactions*, 22(7), 809–819. <https://doi.org/10.1094/MPMI-22-7-0809>
- 523 Pardal, A. J., Piquerez, S. J. M., Id, A. D., Id, L. F., Mastorakis, E., Id, E. R., Latrassé,  
524 D., Id, L. C., Gimenez-ibanez, S., Id, S. H. S., Benhamed, M., & Id, V. N. (2021).  
525 *Immunity onset alters plant chromatin and utilizes EDA16 to regulate oxidative*  
526 *homeostasis*. 1–26. <https://doi.org/10.1371/journal.ppat.1009572>
- 527 Pérez-Reytor, D., Jaña, V., Pavez, L., Navarrete, P., & García, K. (2018). Accessory  
528 toxins of vibriopathogens and their role in epithelial disruption during infection.  
529 *Frontiers in Microbiology*, 9(SEP), 1–11.  
530 <https://doi.org/10.3389/fmicb.2018.02248>
- 531 Pérez-Reytor, D., Pavón, A., Lopez-Joven, C., Ramírez-Araya, S., Peña-Varas, C.,  
532 Plaza, N., Alegría-Arcos, M., Corsini, G., Jaña, V., Pavez, L., del Pozo, T.,  
533 Bastías, R., Blondel, C. J., Ramírez, D., & García, K. (2020). Analysis of the  
534 Zonula occludens Toxin Found in the Genome of the Chilean Non-toxigenic  
535 *Vibrio parahaemolyticus* Strain PMC53.7. *Frontiers in Cellular and Infection*  
536 *Microbiology*, 10(September), 1–13. <https://doi.org/10.3389/fcimb.2020.00482>
- 537 Postma, J., Liebrand, T. W. H., Bi, G., Evrard, A., Bye, R. R., Mbengue, M., Kuhn, H.,  
538 Joosten, M. H. A. J., & Robatzek, S. (2016). Avr4 promotes Cf-4 receptor-like  
539 protein association with the BAK1/SERK3 receptor-like kinase to initiate  
540 receptor endocytosis and plant immunity. *The New Phytologist*, 210(2), 627–  
541 642. <https://doi.org/10.1111/nph.13802>
- 542 Rapicavoli, J., Ingel, B., Blanco-Ulate, B., Cantu, D., & Roper, C. (2018a). *Xylella*  
543 *fastidiosa*: an examination of a re-emerging plant pathogen. *Molecular Plant*  
544 *Pathology*, 19(4), 786–800. <https://doi.org/10.1111/mpm.12585>
- 545 Rapicavoli, J., Ingel, B., Blanco-Ulate, B., Cantu, D., & Roper, C. (2018b). *Xylella*

Sertedakis, et al.,

- 546 fastidiosa: an examination of a re-emerging plant pathogen. *Molecular Plant*  
547 *Pathology*, 19(4), 786–800. <https://doi.org/10.1111/mpp.12585>
- 548 Roper, C., Castro, C., & Ingel, B. (2019). Xylella fastidiosa: bacterial parasitism with  
549 hallmarks of commensalism. *Current Opinion in Plant Biology*, 50, 140–147.  
550 <https://doi.org/10.1016/j.pbi.2019.05.005>
- 551 Roy, P. P., Paul, S., Mitra, I., & Roy, K. (2010). Roy et al. On Two Novel Parameters  
552 for Validation of Predictive QSAR Models. *Molecules*, 2009, 14, 1660-1701.  
553 *Molecules*, 15(1), 604–605. <https://doi.org/10.3390/molecules15010604>
- 554 Saitou, N., & Nei, M. (1987). The neighbor-joining method: a new method for  
555 reconstructing phylogenetic trees. *Molecular Biology and Evolution*, 4(4), 406–  
556 425. <https://doi.org/10.1093/oxfordjournals.molbev.a040454>
- 557 Schneider, K., van der Werf, W., Cendoya, M., Mourits, M., Navas-Cortés, J. A.,  
558 Vicent, A., & Lansink, A. O. (2020). Impact of Xylella fastidiosa subspecies  
559 pauca in European olives. *Proceedings of the National Academy of Sciences of*  
560 *the United States of America*, 117(17), 9250–9259.  
561 <https://doi.org/10.1073/pnas.1912206117>
- 562 Schrodinger, L. L. C., & DeLano, W. (n.d.). PyMOL.
- 563 Schwessinger, B., & Zipfel, C. (2008). News from the frontline: recent insights into  
564 PAMP-triggered immunity in plants. *Current Opinion in Plant Biology*, 11(4),  
565 389–395. <https://doi.org/10.1016/j.pbi.2008.06.001>
- 566 Simon, G. M., & Cravatt, B. F. (2010). Activity-based proteomics of enzyme  
567 superfamilies: Serine hydrolases as a case study. *Journal of Biological*  
568 *Chemistry*, 285(15), 11051–11055. <https://doi.org/10.1074/jbc.R109.097600>
- 569 Song, J., Win, J., Tian, M., Schornack, S., Kaschani, F., Ilyas, M., Van Der Hoorn, R.  
570 A. L., & Kamoun, S. (2009). Apoplastic effectors secreted by two unrelated  
571 eukaryotic plant pathogens target the tomato defense protease Rcr3.  
572 *Proceedings of the National Academy of Sciences of the United States of*  
573 *America*, 106(5), 1654–1659. <https://doi.org/10.1073/pnas.0809201106>
- 574 Stotz, H. U., Mitroussia, G. K., de Wit, P. J. G. M., & Fitt, B. D. L. (2014). Effector-  
575 triggered defence against apoplastic fungal pathogens. *Trends in Plant Science*,  
576 19(8), 491–500. <https://doi.org/10.1016/j.tplants.2014.04.009>
- 577 van der Burgh, A. M., & Joosten, M. H. A. J. (2019). Plant Immunity: Thinking  
578 Outside and Inside the Box. *Trends in Plant Science*, xx(xx), 1–15.  
579 <https://doi.org/10.1016/j.tplants.2019.04.009>
- 580 Yang, J., Yan, R., Roy, A., Xu, D., Poisson, J., & Zhang, Y. (2015). The I-TASSER  
581 Suite: protein structure and function prediction. *Nature Methods*, 12(1), 7–8.  
582 <https://doi.org/10.1038/nmeth.3213>
- 583 Yang, J., & Zhang, Y. (2015). I-TASSER server: new development for protein  
584 structure and function predictions. *Nucleic Acids Research*, 43(W1), W174–  
585 W181. <https://doi.org/10.1093/nar/gkv342>
- 586 Zhang, S., Chakrabarty, P. K., Fleites, L. A., Rayside, P. A., Hopkins, D. L., &  
587 Gabriel, D. W. (2015). Three new pierce’s disease pathogenicity effectors  
588 identified using xylella fastidiosa biocontrol strain EB92-1. *PLoS ONE*, 10(7), 1–  
589 17. <https://doi.org/10.1371/journal.pone.0133796>

*Sertedakis, et al.,*

590 Zuckerkandl, E., & Pauling, L. (1965). Molecules as documents of evolutionary  
591 history. *Journal of Theoretical Biology*, 8(2), 357–366.  
592 [https://doi.org/10.1016/0022-5193\(65\)90083-4](https://doi.org/10.1016/0022-5193(65)90083-4)

# Tables and Figures



Figure 1

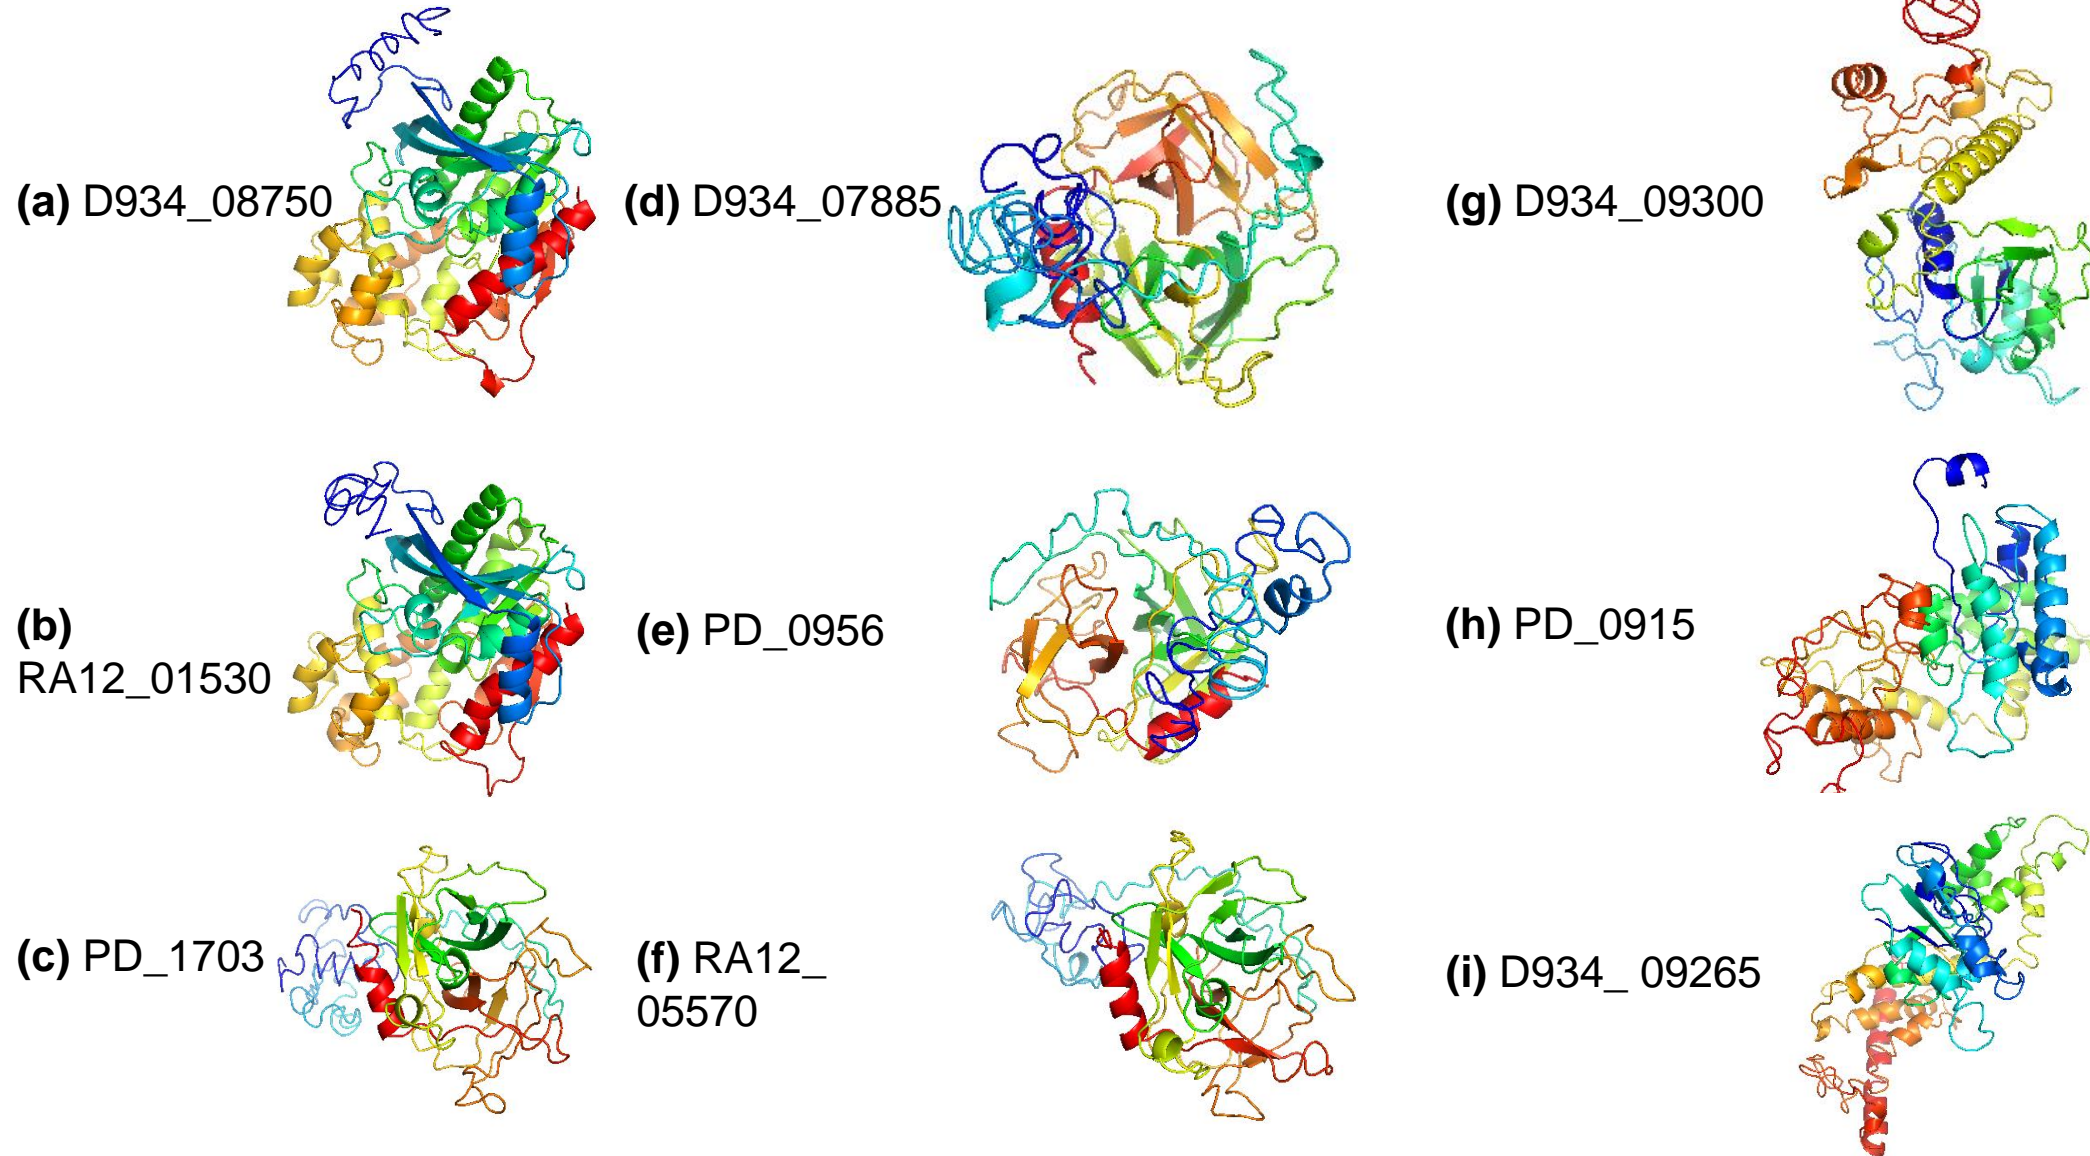



Figure 2

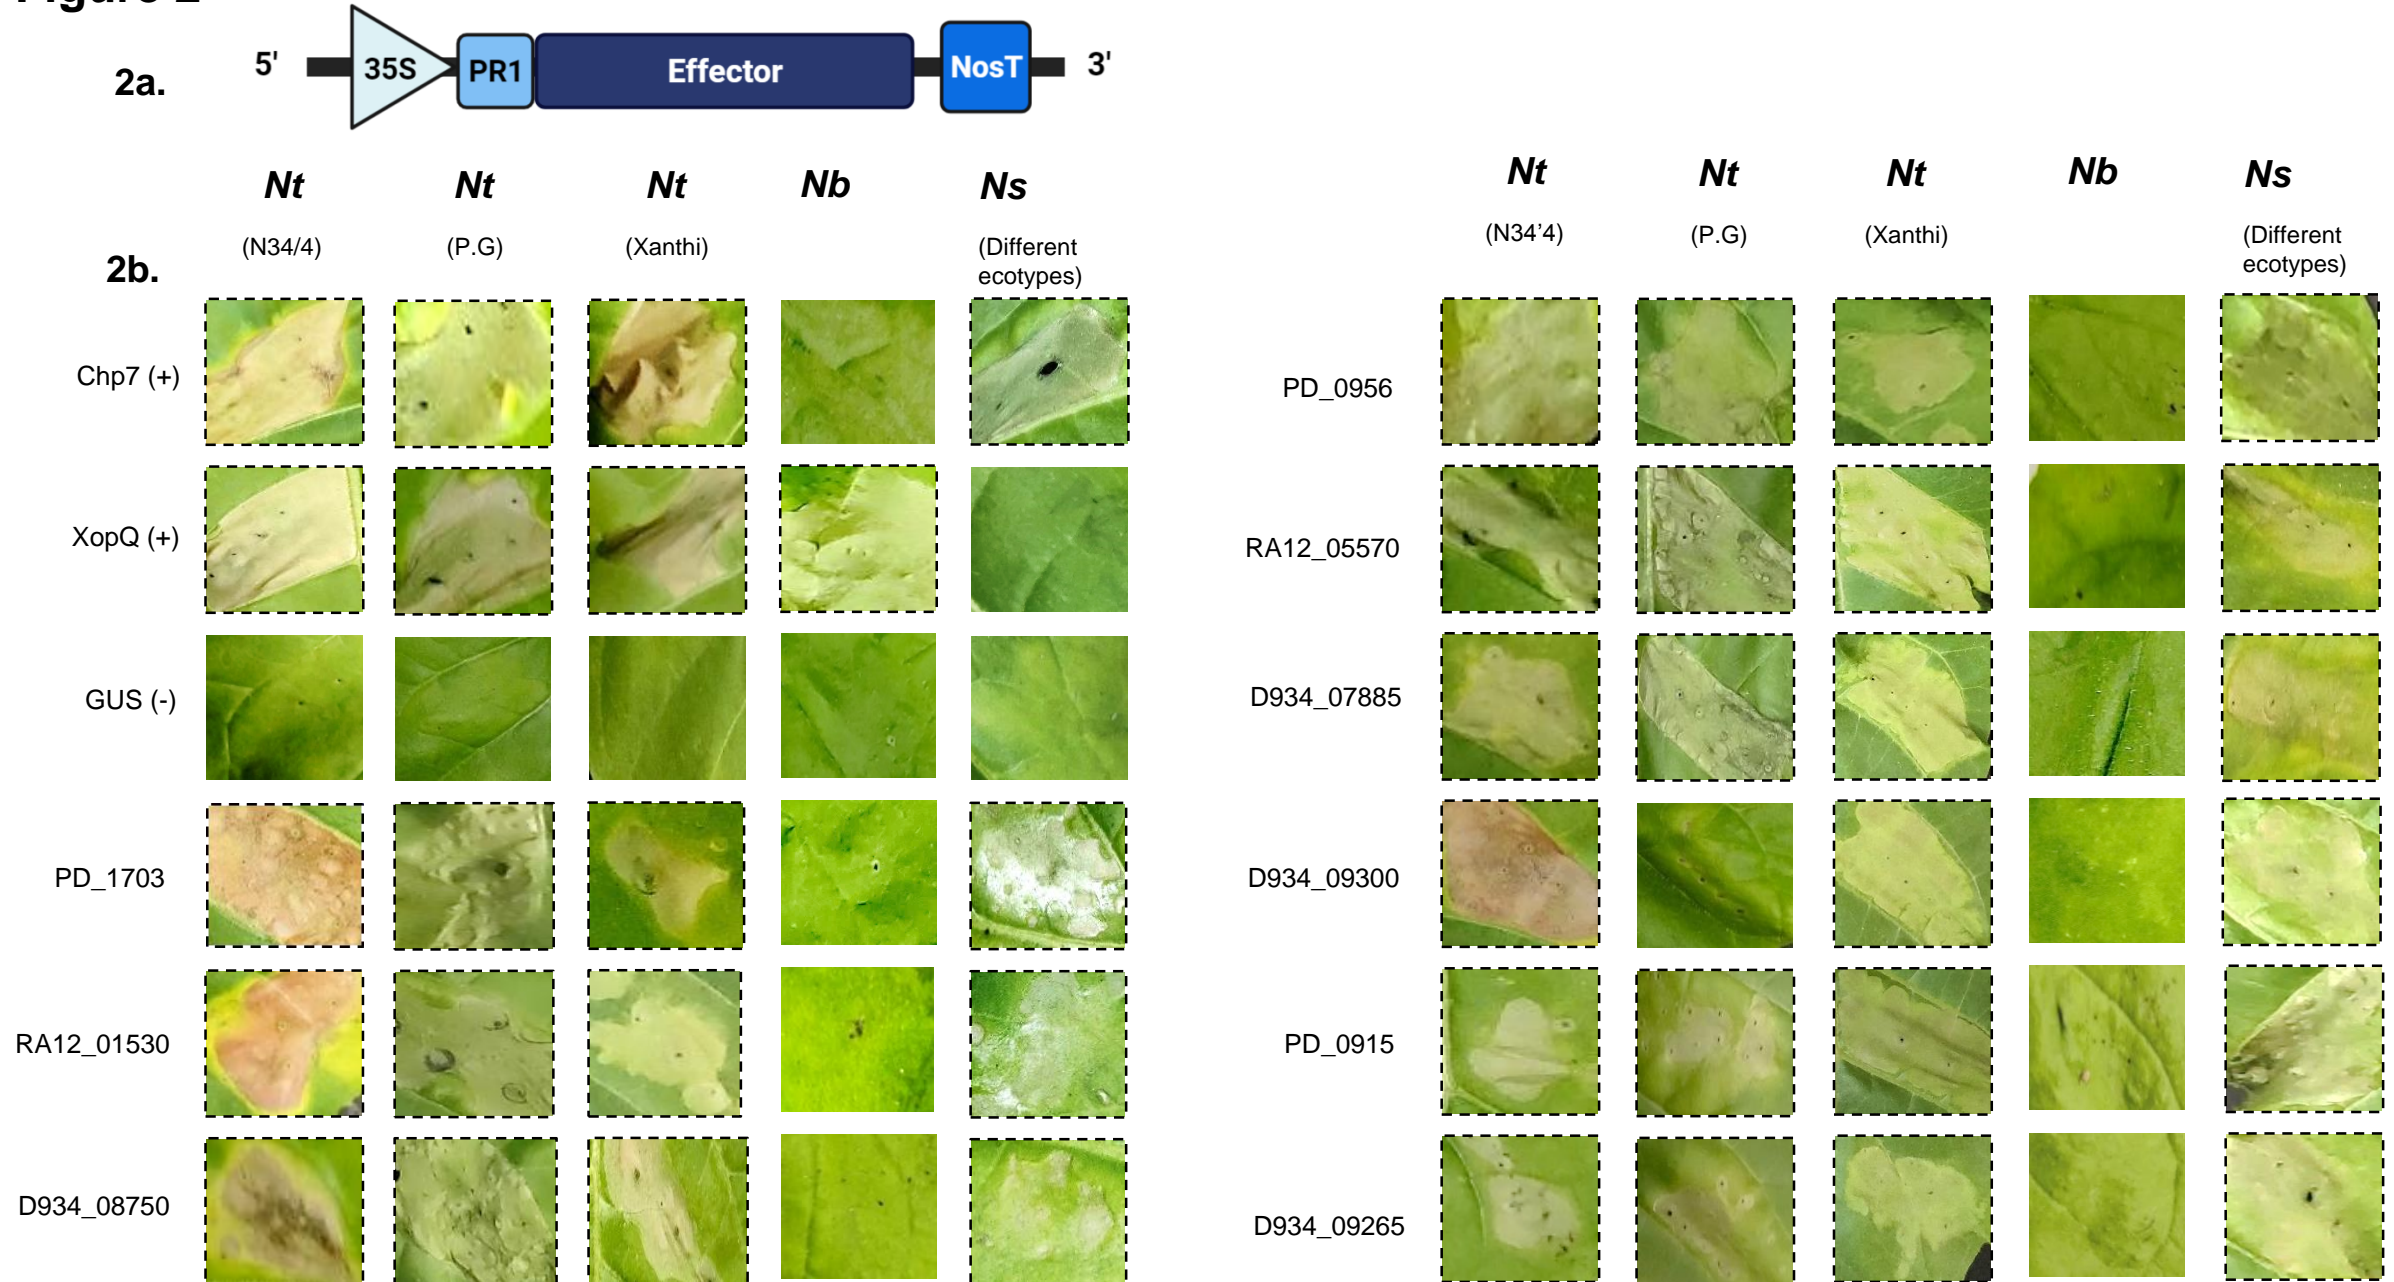

Figure 3

A.

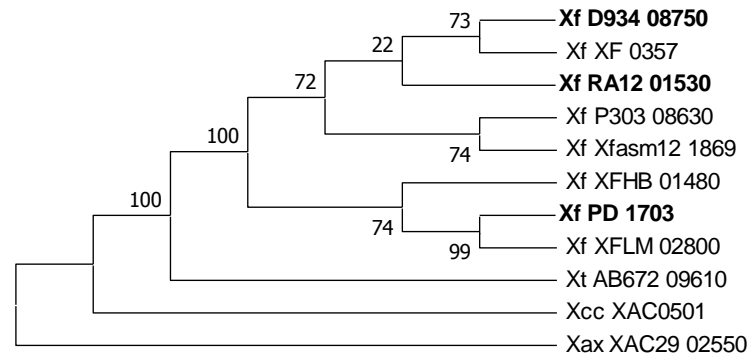

B.

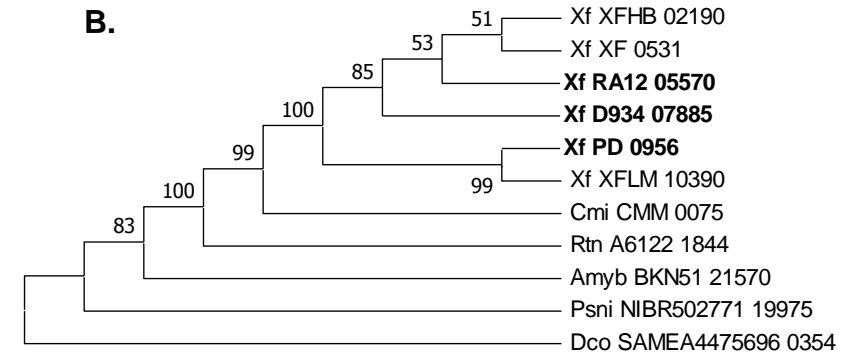

C.

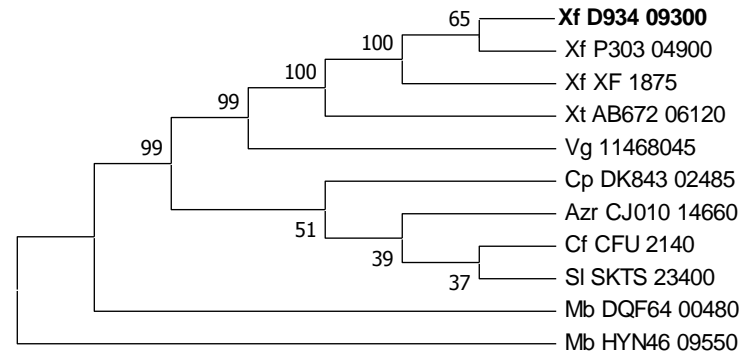

D.

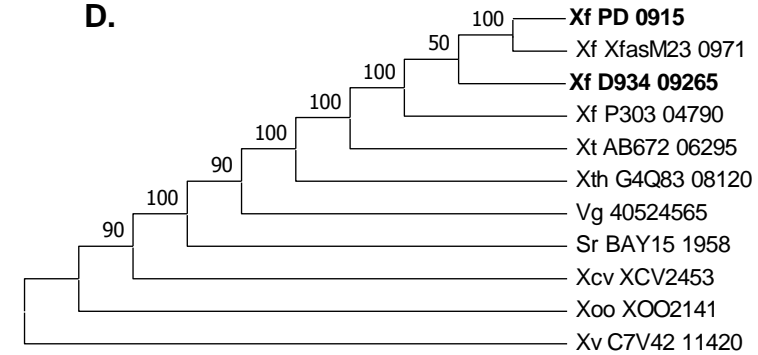

| <i>Xylella fastidiosa</i><br>Proteins | Sequence<br>similarity (PDB) | Description                      | Structural<br>template (PDB) | Description                                |
|---------------------------------------|------------------------------|----------------------------------|------------------------------|--------------------------------------------|
| PD_0956                               | 3WY8                         | Hydrolase/Protease               | 3WY8                         | Hydrolase/Serine protease                  |
| PD_0915                               | 2R2A                         | Zonular Occludens Toxin<br>(Zot) | 2DHR                         | ATP-dependent<br>metalloprotease/Hydrolase |
| PD_1703                               | 3WY8                         | Hydrolase/serine protease        | 1Z8G                         | Hydrolase/Hydrolase Inhibitor              |
| D934_08750                            | 3H2K                         | Hydrolase/Esterase (LipA)        | 3H2K                         | Hydrolase/ Esterase (LipA)                 |
| D934_07885                            | 3WY8                         | Hydrolase/Serine protease        | 1Z8G                         | Hydrolase/Hydrolase Inhibitor              |
| D934_09300                            | 2R2A                         | Zonular Occludens Toxin<br>(Zot) | 2R2A                         | Zonular Occludens Toxin ( Zot)             |
| D934_09265                            | 2R2A                         | Zonular Occludens Toxin<br>(Zot) | 4WWO                         | Transferase/Transferase Inhibitor          |
| RA12_01530                            | 3H2K                         | Hydrolase/ Esterase (LipA)       | 3H2K                         | Hydrolase/ Esterase (LipA)                 |
| RA12_05570                            | 3WY8                         | HydrolaseSerine protease         | 1Z8G                         | Hydrolase/Hydrolase Inhibitor              |
| D934_00810                            | 5N8P                         | Membrane Protein                 | 3JAV                         | Transport Protein                          |
| D934_05685                            | 5N8P                         | Membrane Protein                 | 5IJO                         | Transport Protein                          |
| D934_12725                            | 3JAV                         | Transport Protein                | 3JAV                         | Transport Protein                          |
| D934_08755                            | 3H2K                         | Hydrolase/ Esterase (LipA)       | 3H2K                         | Hydrolase/ Esterase (LipA)                 |
| D934_12535                            | 3H2K                         | Hydrolase/ Esterase (LipA)       | 3H2K                         | Hydrolase/ Esterase (LipA)                 |
| D934_12795                            | 7KVE                         | Blood Clotting                   | 1RWR                         | Cell Adhesion                              |
| RA12_11155                            | 4UIC                         | Sugar Binding Protein            | 1G6O                         | Hydrolase                                  |
| RA12_11125                            | 3V05                         | Toxin                            | 5N8P                         | Membrane Protein                           |
| RA12_03930                            | 6VDP                         | Oxidoreductase                   | 6VDP                         | Oxidoreductase                             |
| RA12_03905                            | 6W1S                         | Gene Regulation                  | 6WIS                         | Gene Regulation                            |

**Table 1**

# Supplementary Tables and Figures

## Supplementary Table S1

| <b>Xf gene ID</b> | <b>Subspecies/ Strains</b> | <b>Host</b> |
|-------------------|----------------------------|-------------|
| PD0915            | strain Temecula1           | Grapevine   |
| PD0956            | strain Temecula1           | Grapevine   |
| PD1703            | strain Temecula1           | Grapevine   |
| RA12_01530        | strain CoDiRO              | Olive tree  |
| RA12_03905        | strain CoDiRO              | Olive tree  |
| RA12_03930        | strain CoDiRO              | Olive tree  |
| RA12_05570        | strain CoDiRO              | Olive tree  |
| RA12_11125        | strain CoDiRO              | Olive tree  |
| RA12_11155        | strain CoDiRO              | Olive tree  |
| D934_00810        | subsp. sandyi Ann-1        | Oleander    |
| D934_05685        | subsp. sandyi Ann-1        | Oleander    |
| D934_07885        | subsp. sandyi Ann-1        | Oleander    |
| D934_08750        | subsp. sandyi Ann-1        | Oleander    |
| D934_08755        | subsp. sandyi Ann-1        | Oleander    |
| D934_09265        | subsp. sandyi Ann-1        | Oleander    |
| D934_09300        | subsp. sandyi Ann-1        | Oleander    |
| D934_12535        | subsp. sandyi Ann-1        | Oleander    |
| D934_12725        | subsp. sandyi Ann-1        | Oleander    |
| D934_12795        | subsp. sandyi Ann-1        | Oleander    |

## Supplementary Figure S1

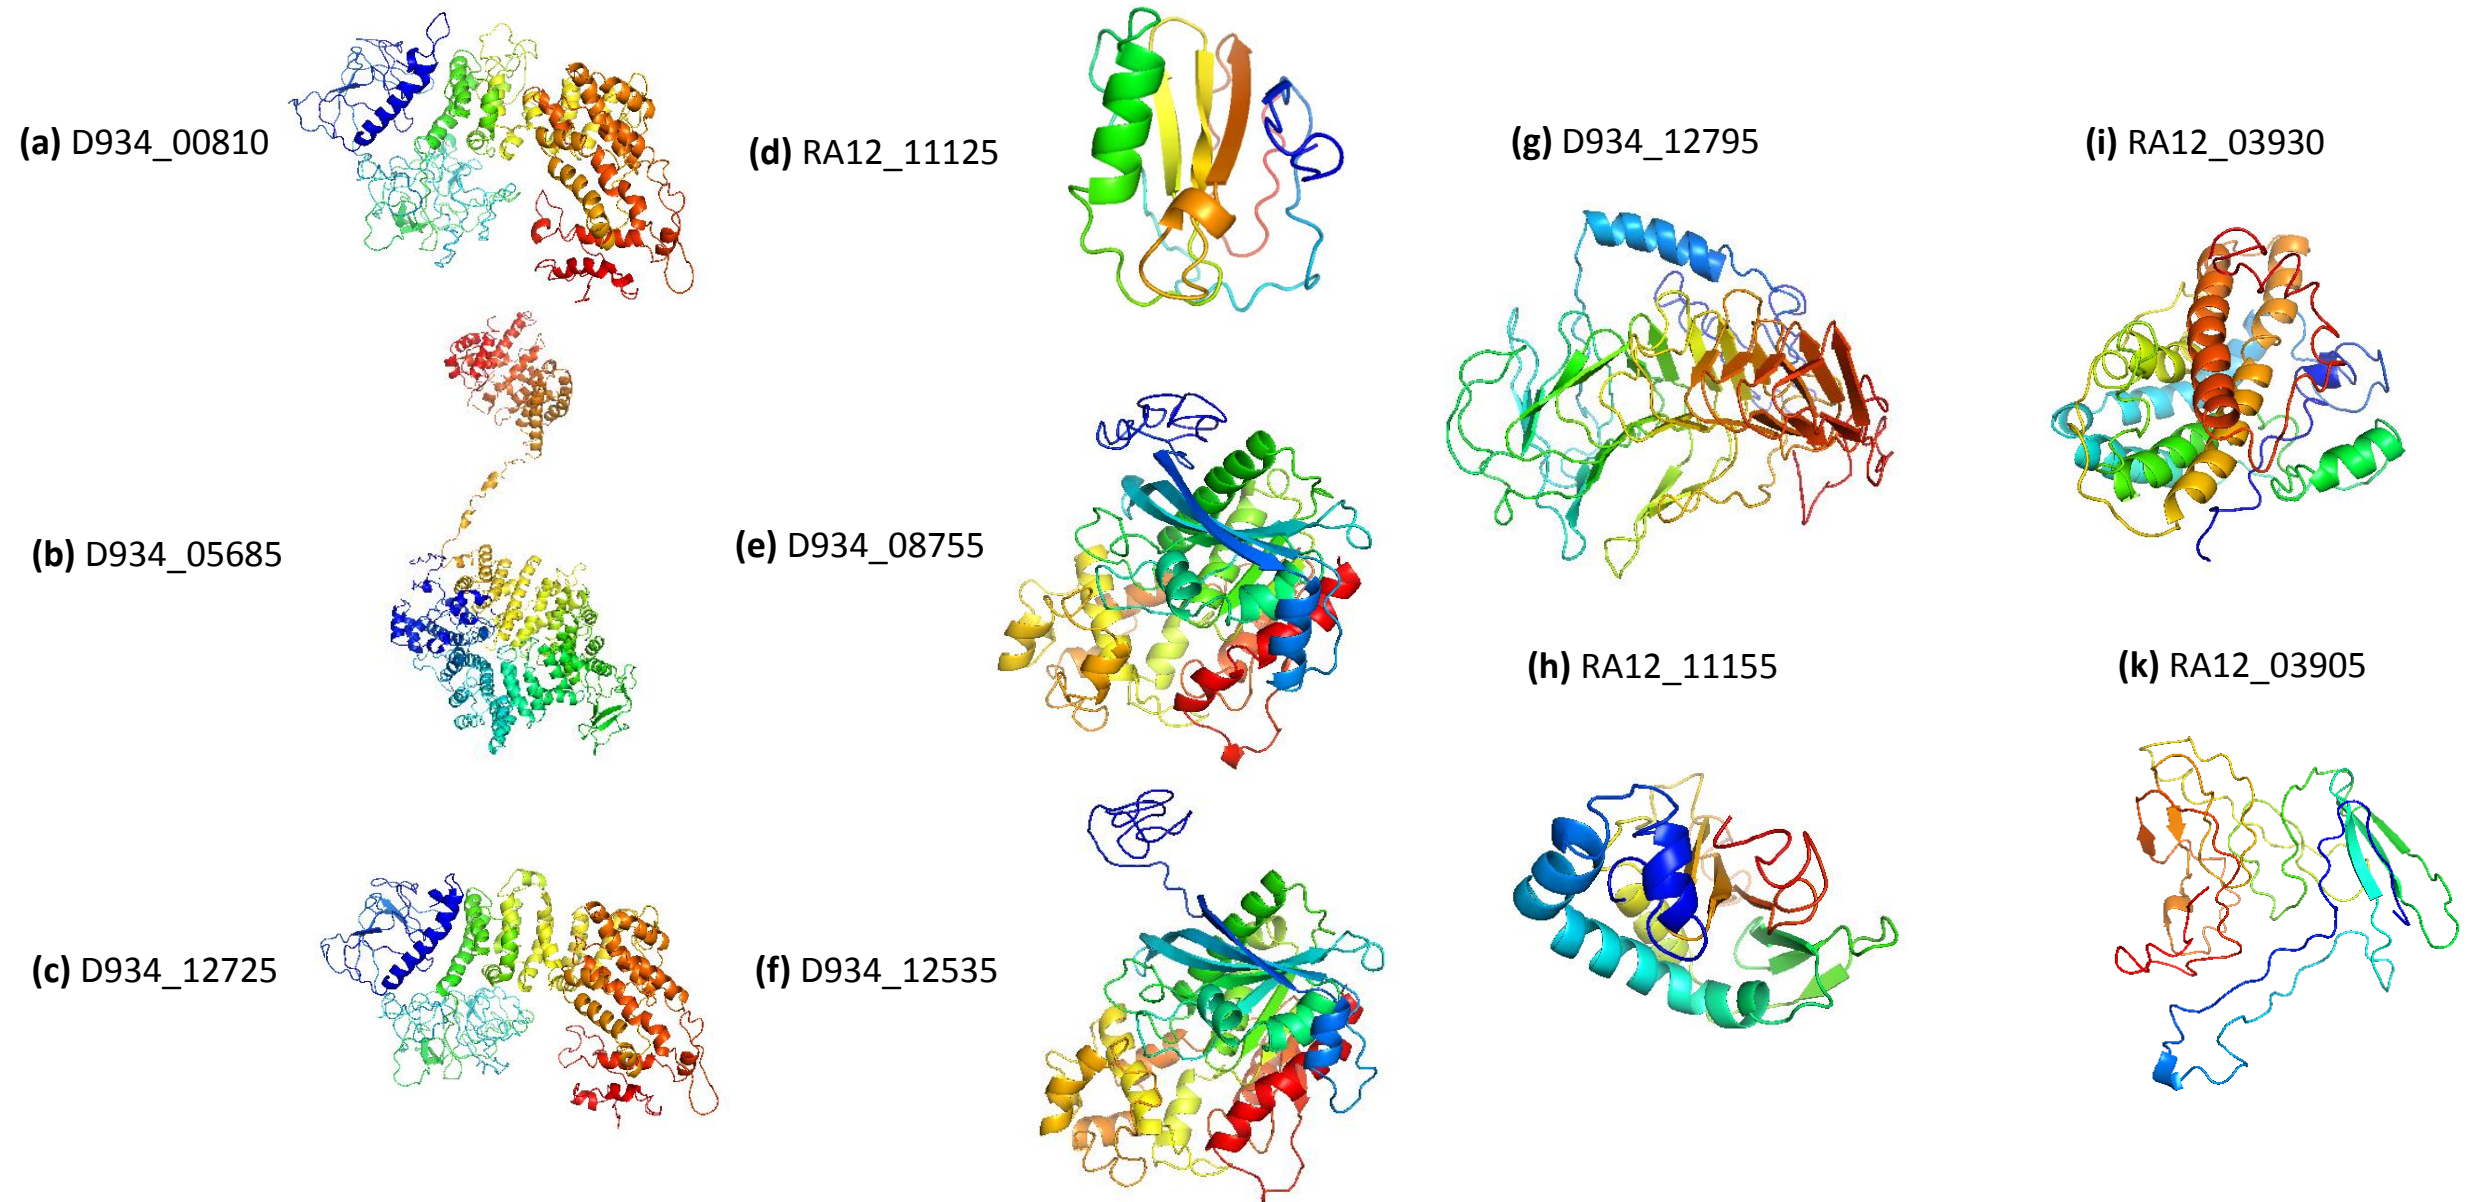



*N. t*

*N. t*

*N. b*

*N. t*

*N. t*

*N. b*

(N34/4)

(P.G)

(N34/4)

(P.G)

Supplementary Figure S2

Chp7 (+)

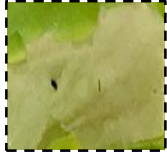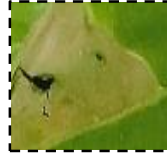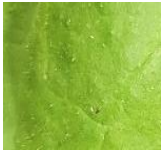

D934\_05685

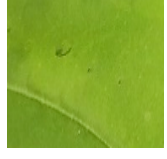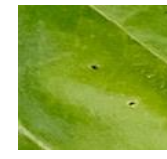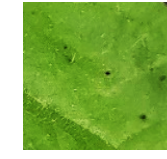

XopQ (+)

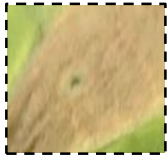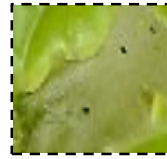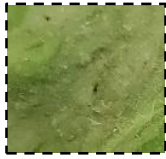

D934\_08755

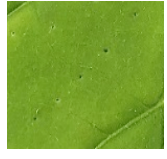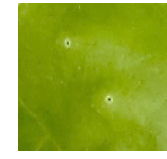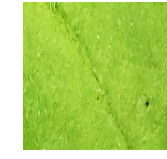

GUS (-)

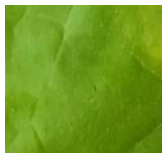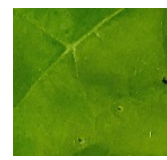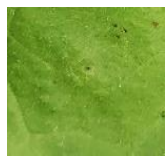

D934\_12535

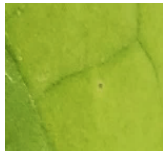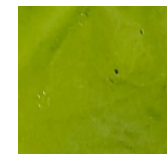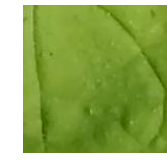

RA12\_03905

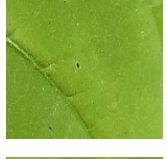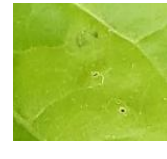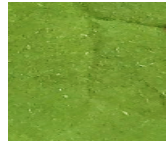

D934\_12725

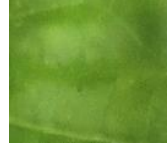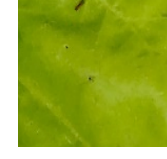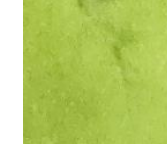

RA12\_03930

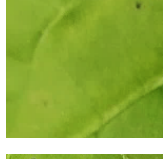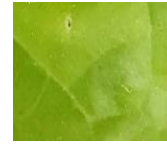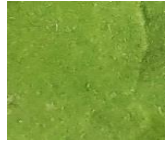

D934\_12795

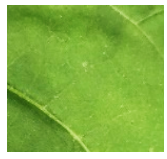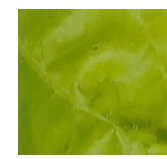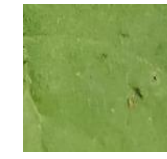

RA12\_11125

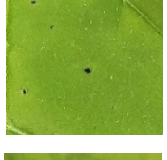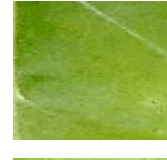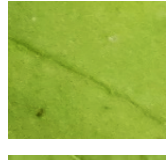

RA12\_11155

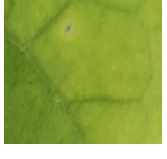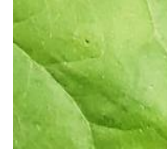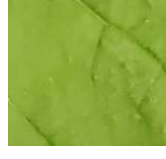

D934\_00810

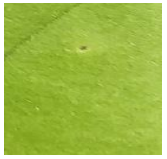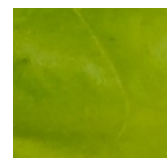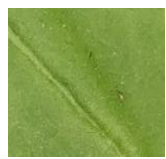



Cell death intensity score (%)

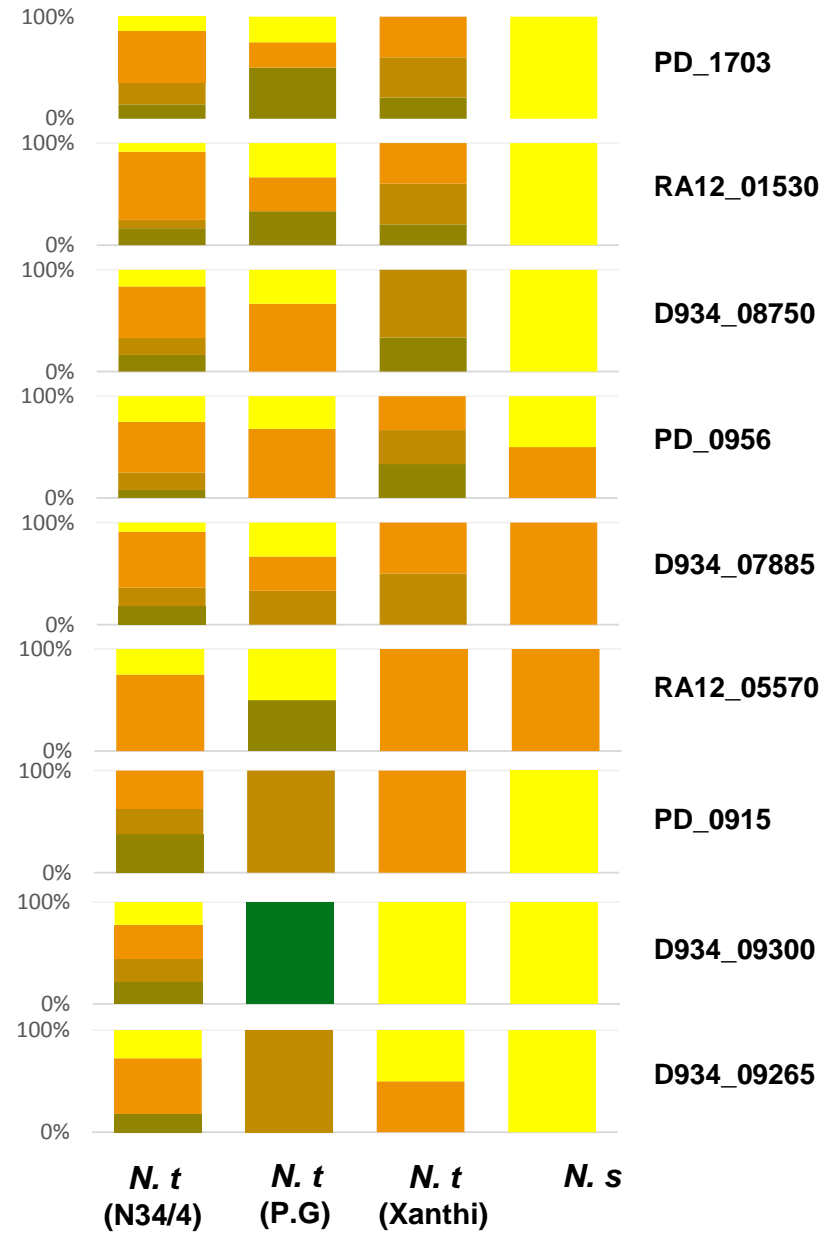

### Supplementary Figure S3

Cell death intensity score

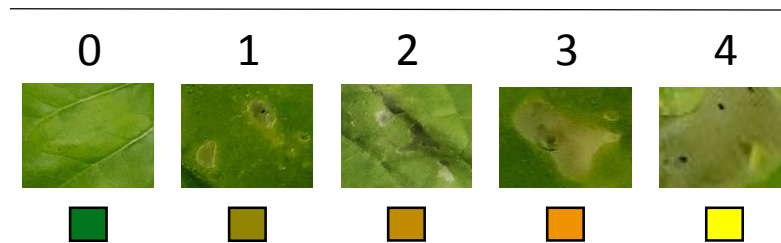

## Supplementary Figure S4

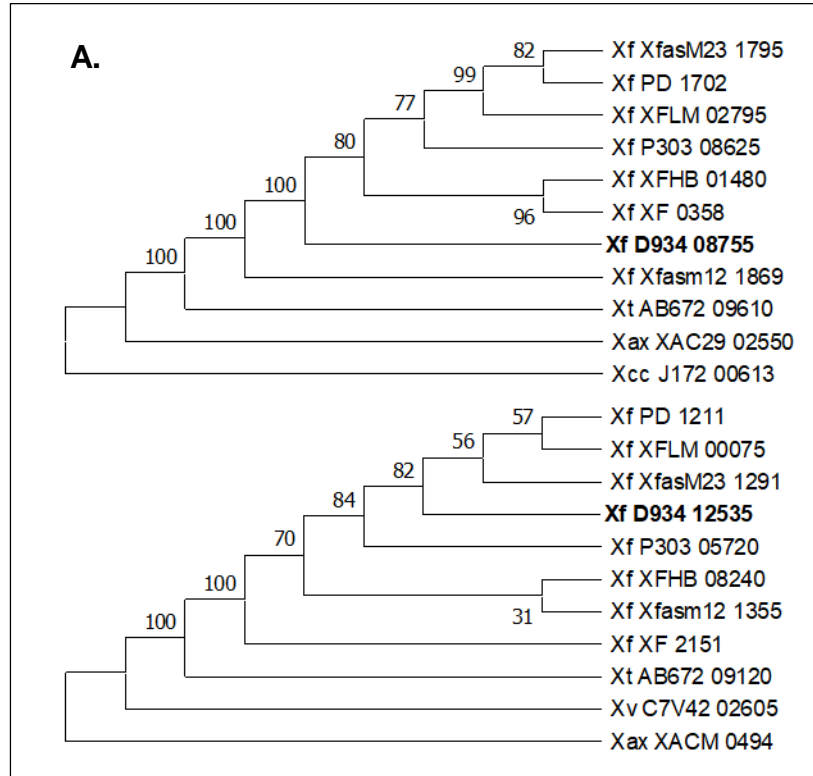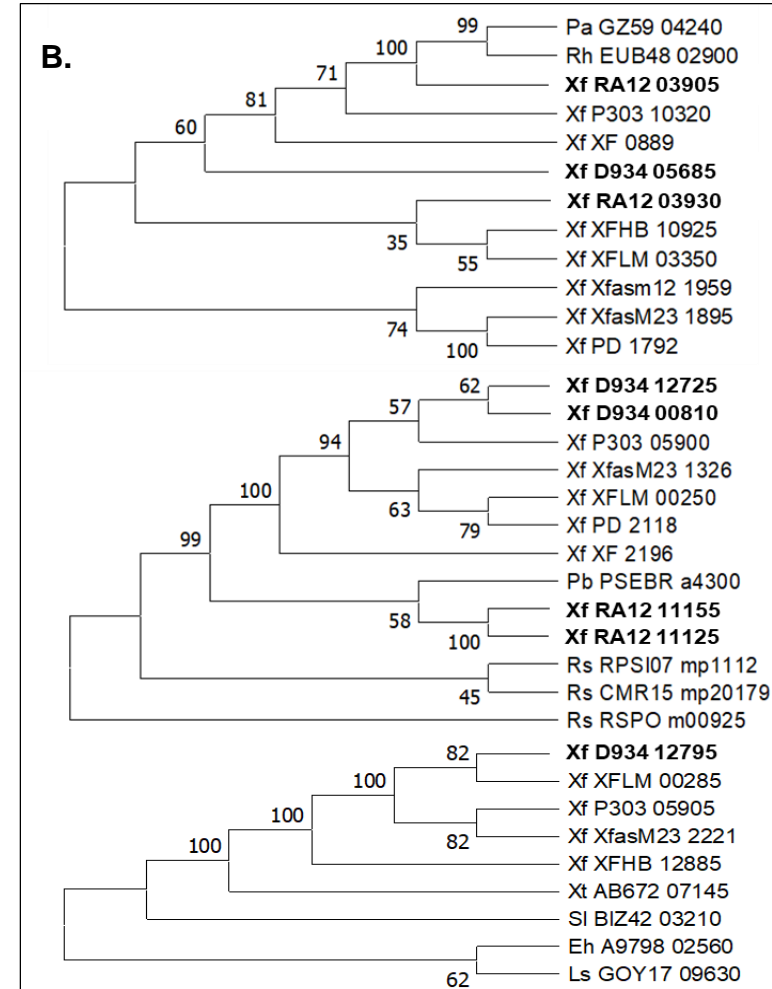

Source: http://biorxiv.org/content/10.1101/2021.05.27.445625v1.full.pdf
